# Supplementary material for: Longitudinal analysis of regional cerebellum volumes during normal aging
Source: PubMed Central journal article supplement — Neuroimage. Author manuscript; Available in PMC 2023 Nov 28. (PMC10683793; doi:10.1016/j.neuroimage.2020.117062), 2020-06-25

# Longitudinal Analysis of Regional Cerebellum Volumes During Normal Aging: Supplementary Materials

Shuo Han<sup>a,b,\*</sup>, Yang An<sup>b</sup>, Aaron Carass<sup>c</sup>, Jerry L. Prince<sup>a,c,d</sup>, Susan M. Resnick<sup>b</sup>

<sup>a</sup>*Department of Biomedical Engineering,  
The Johns Hopkins University, Baltimore, MD 21218, USA*

<sup>b</sup>*Laboratory of Behavioral Neuroscience, National Institute on Aging,  
National Institutes of Health, Baltimore, MD 20892, USA*

<sup>c</sup>*Department of Electrical and Computer Engineering,  
The Johns Hopkins University, Baltimore, MD 21218, USA*

<sup>d</sup>*Department of Computer Science,  
The Johns Hopkins University, Baltimore, MD 21218, USA*

---

Longitudinal trajectories of cerebellar sub-region volumes. Thick lines indicate the trajectories. Dots indicate volumes of randomly selected subjects and are connected by thin lines for the same subjects. Each thick line segment is plotted with the baseline age at its starting point, 0–4 follow-up years, and 1,400 cm<sup>3</sup> ICV. Note that if the coefficients of the interactions—baseline age × follow-up interval and sex × follow-up interval—are not significant, we do not incorporate them into these figures.

---

\* *Please address correspondence to:*  
Shuo Han,  
Department of Biomedical Engineering, The Johns Hopkins University,  
3400 N. Charles St., Baltimore, MD 21218, USA.

*Email address:* shan50@jhu.edu (Shuo Han)

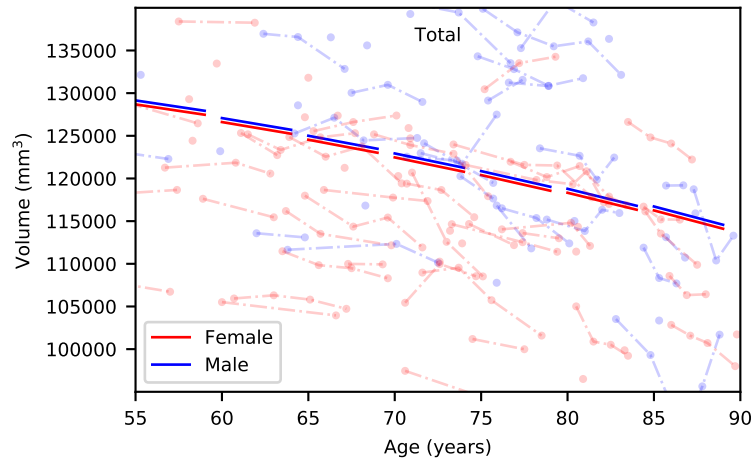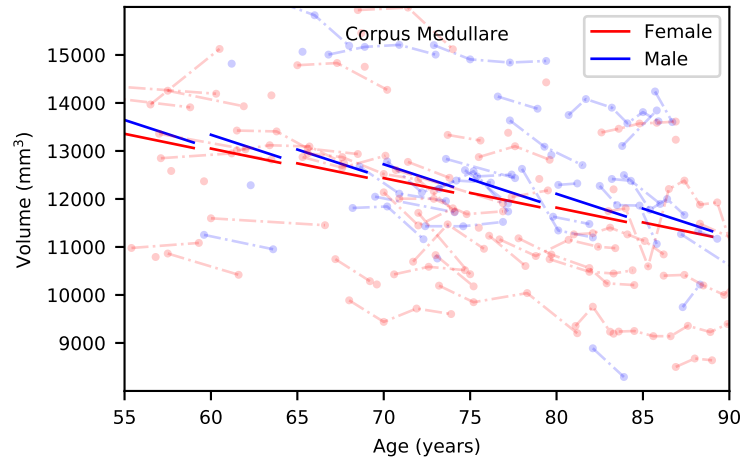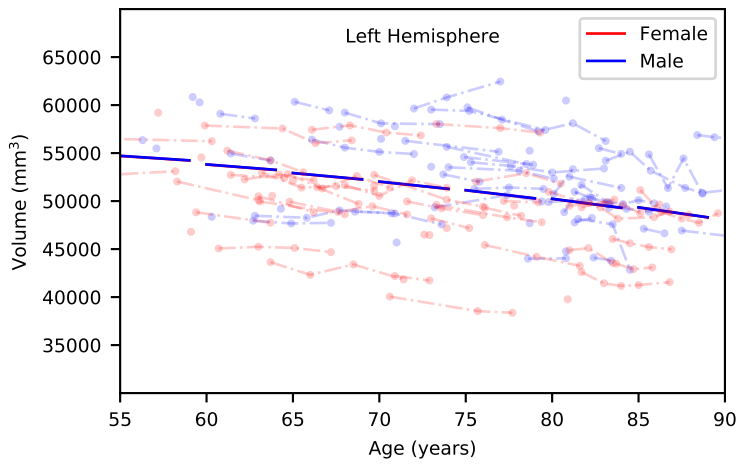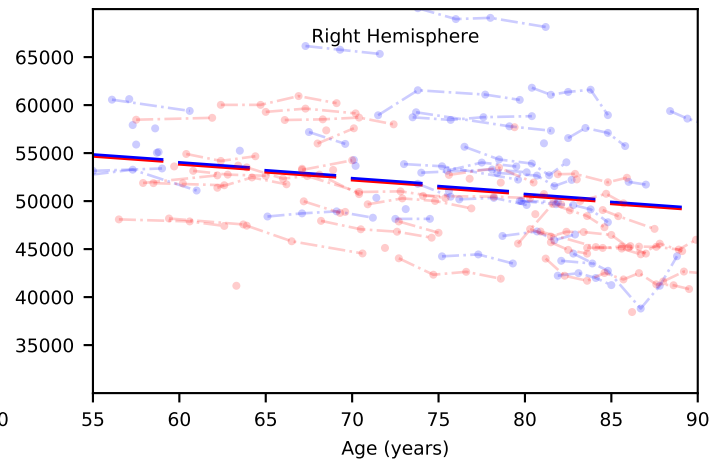

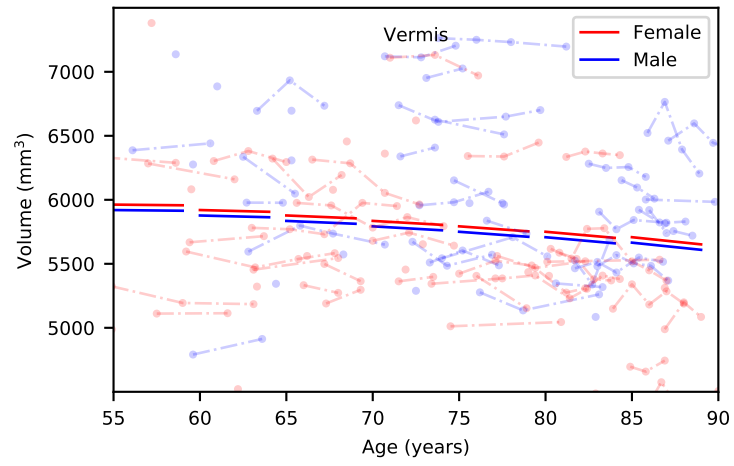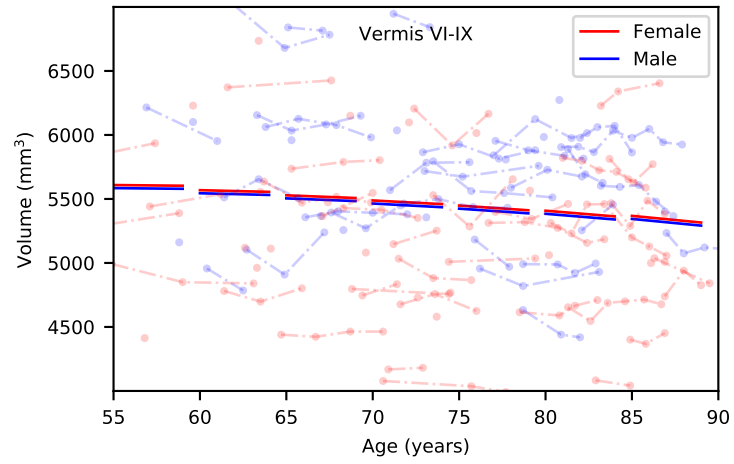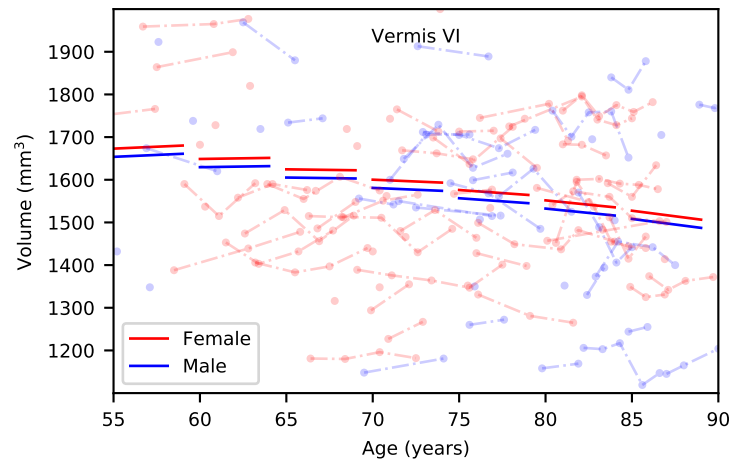

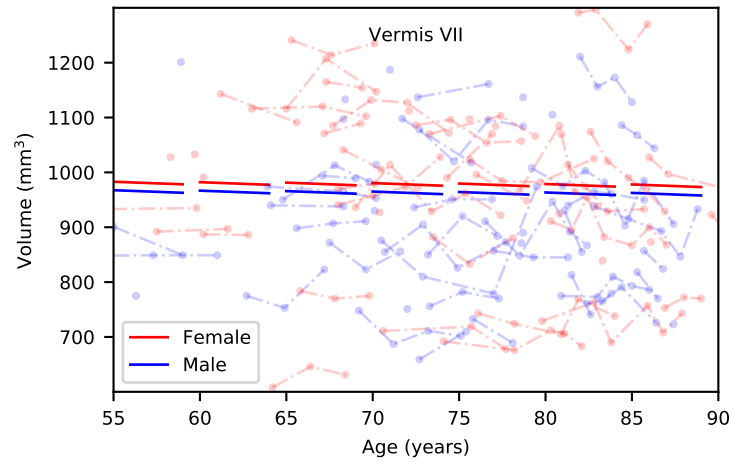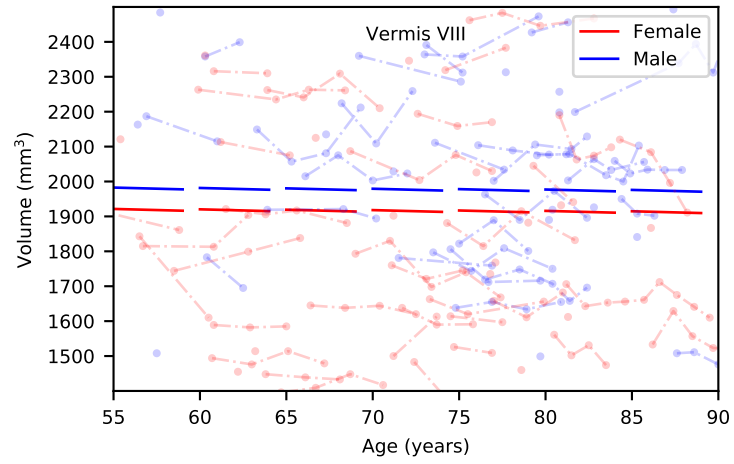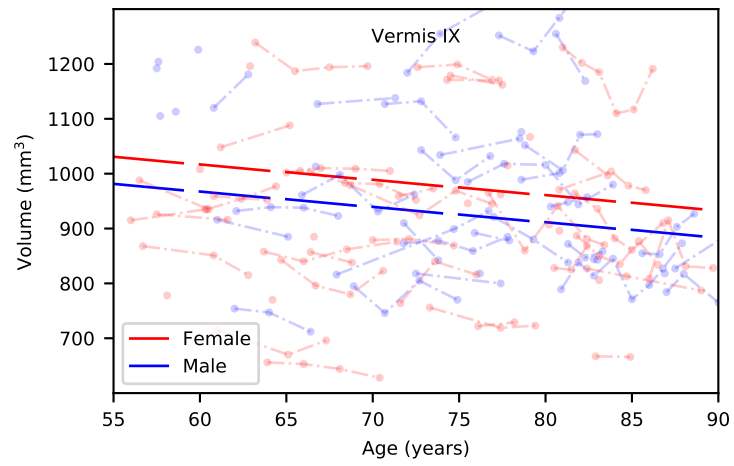

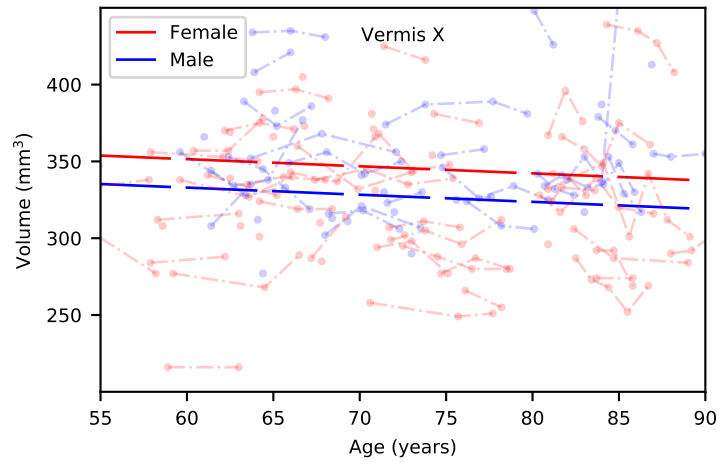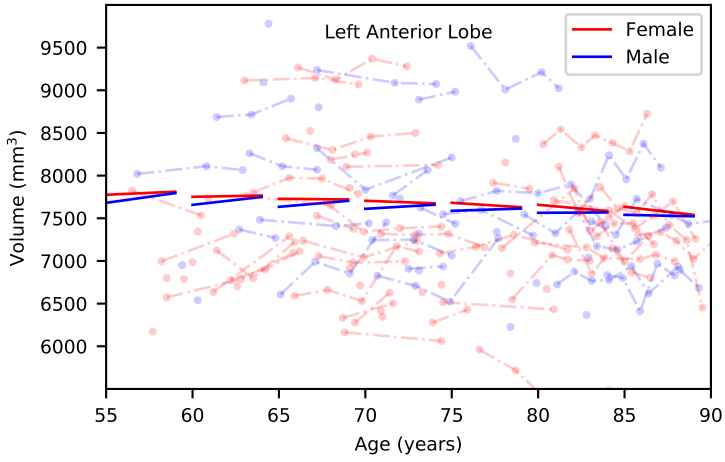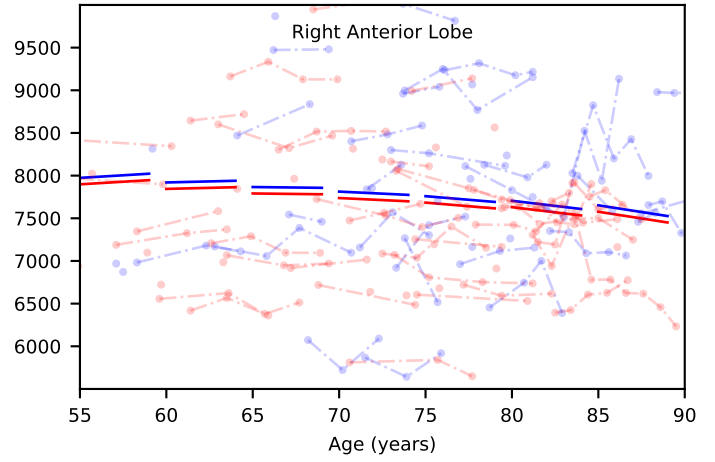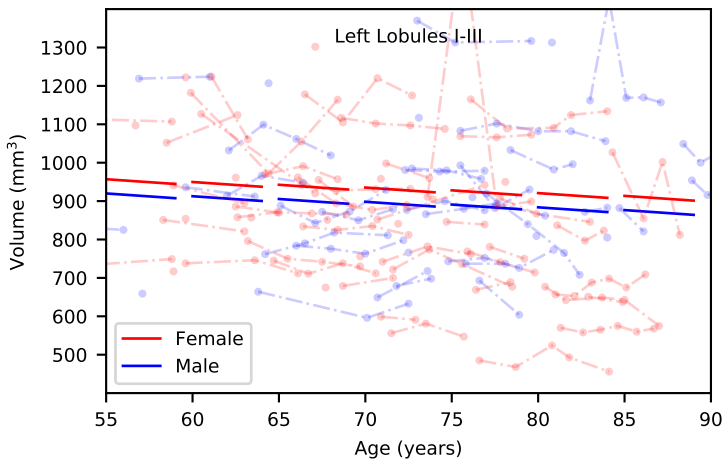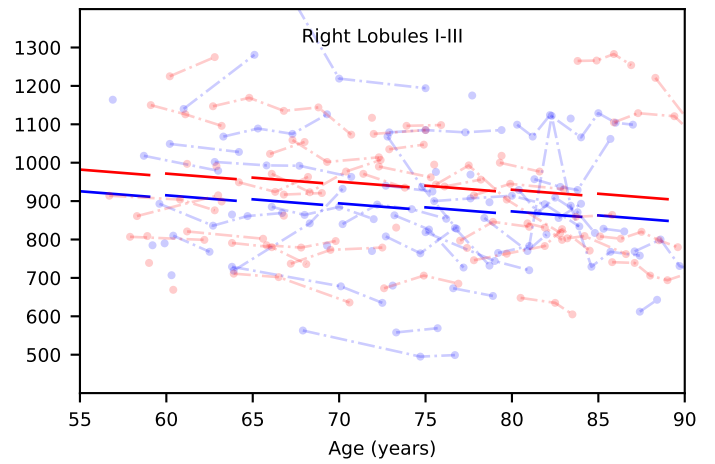

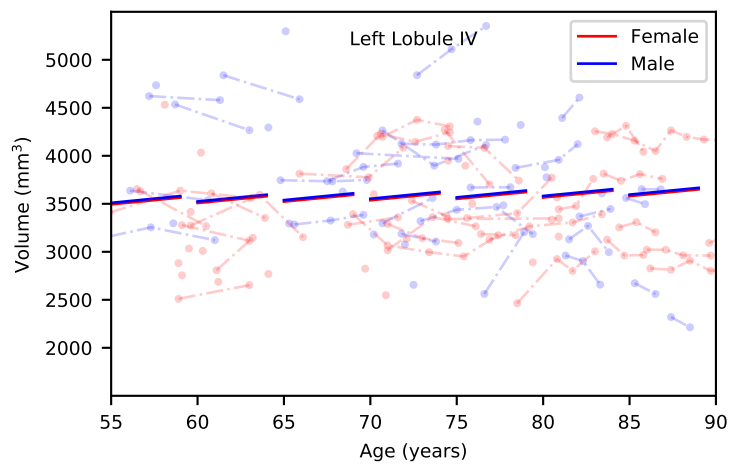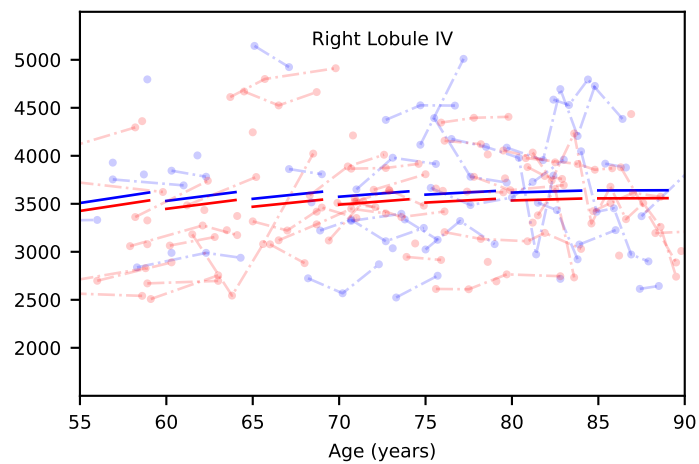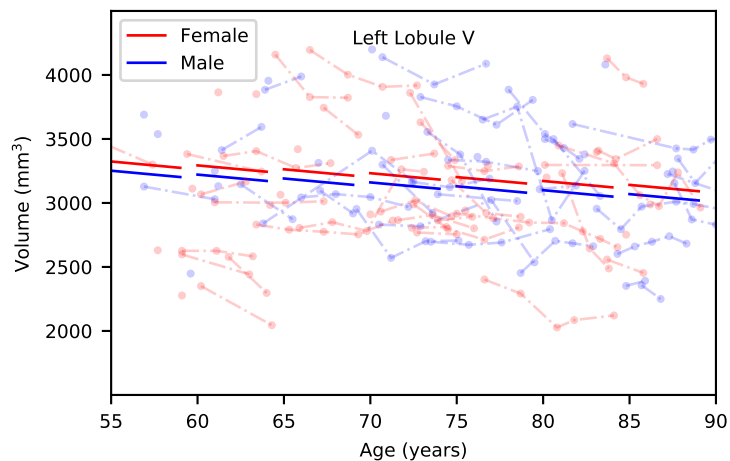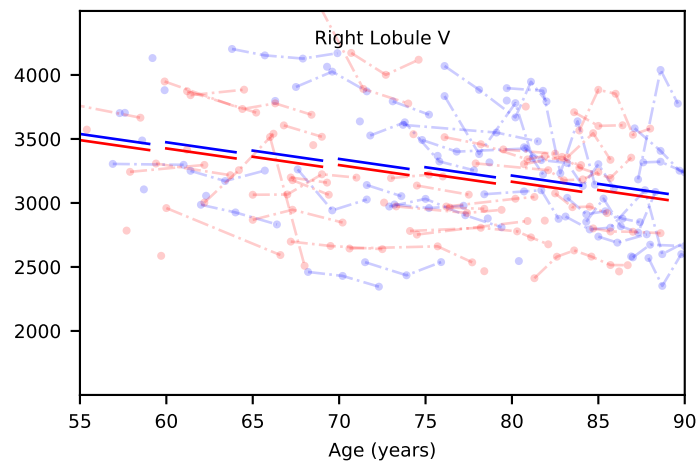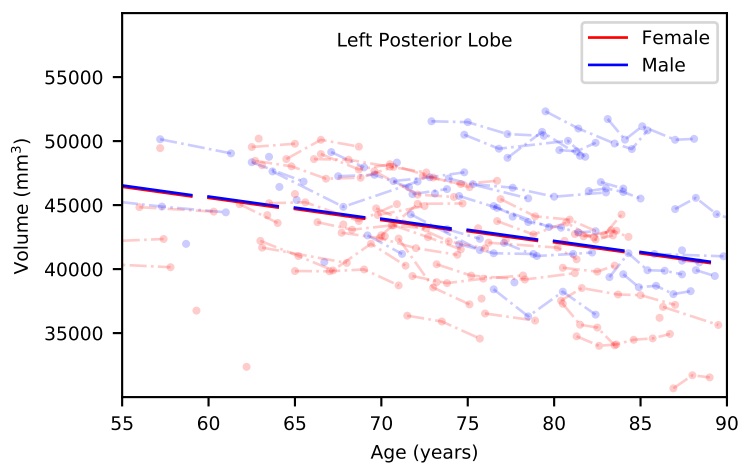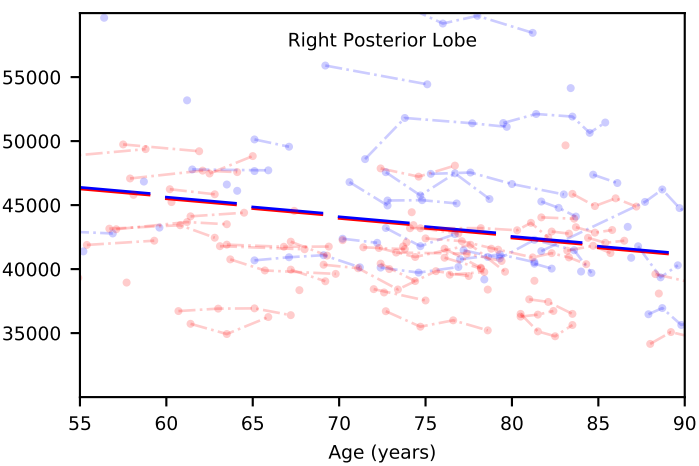

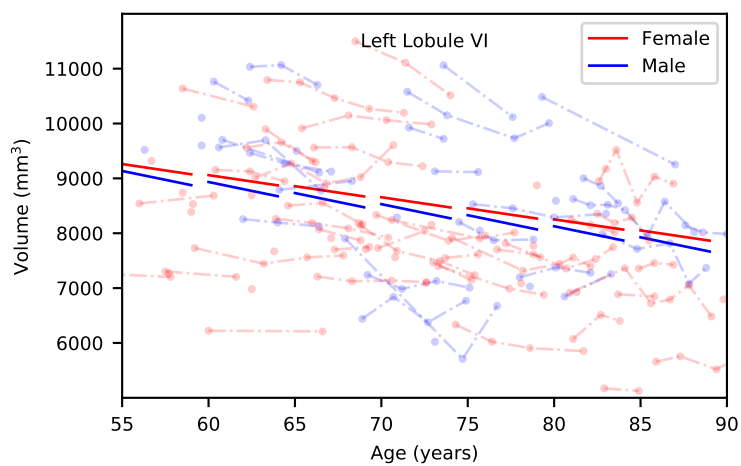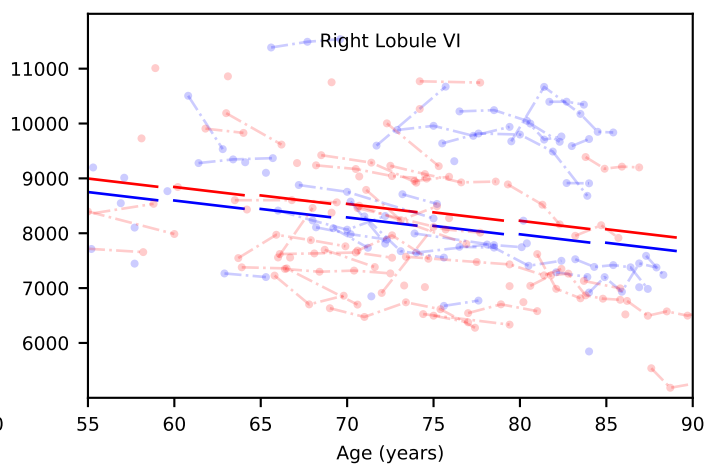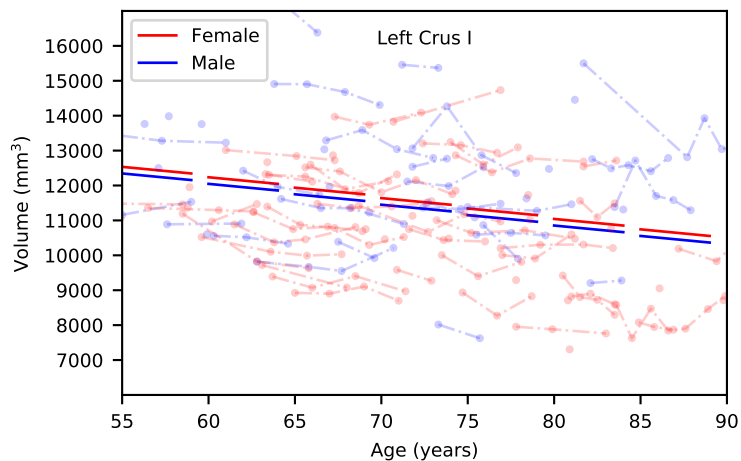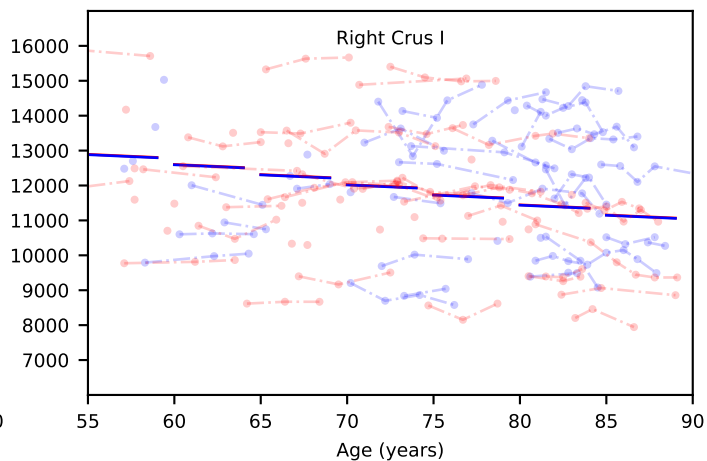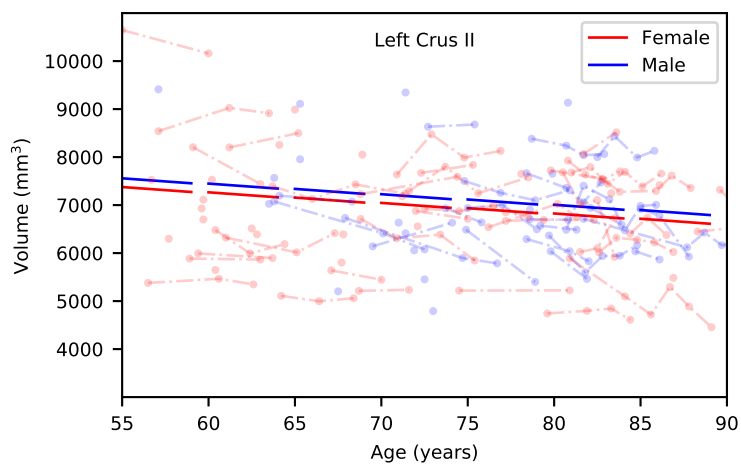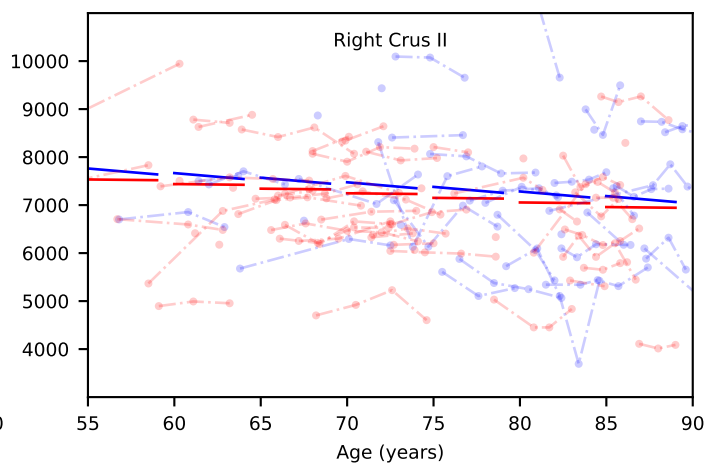

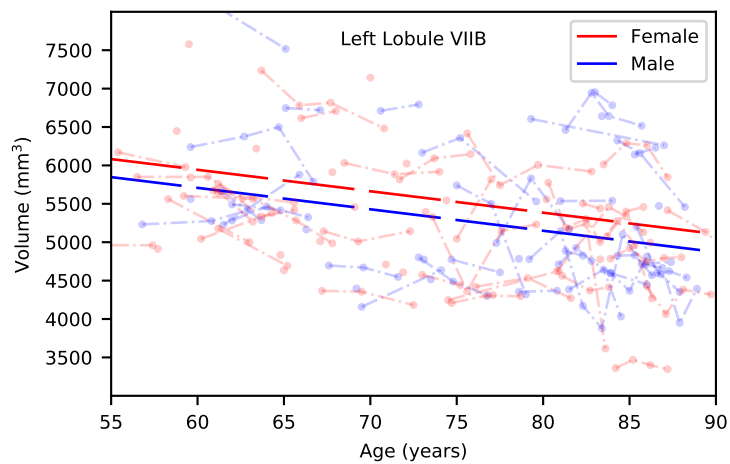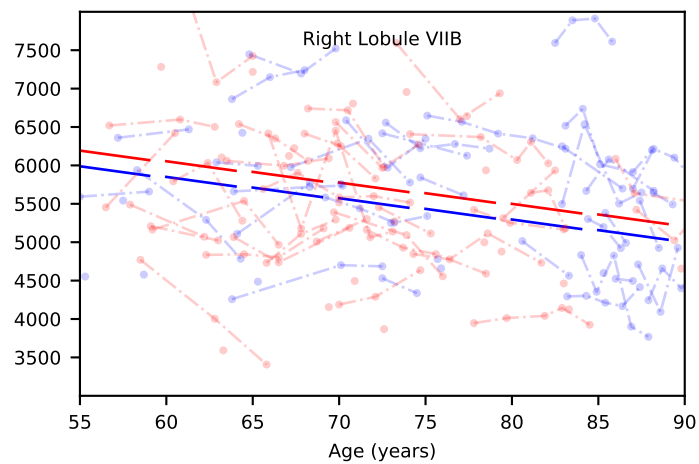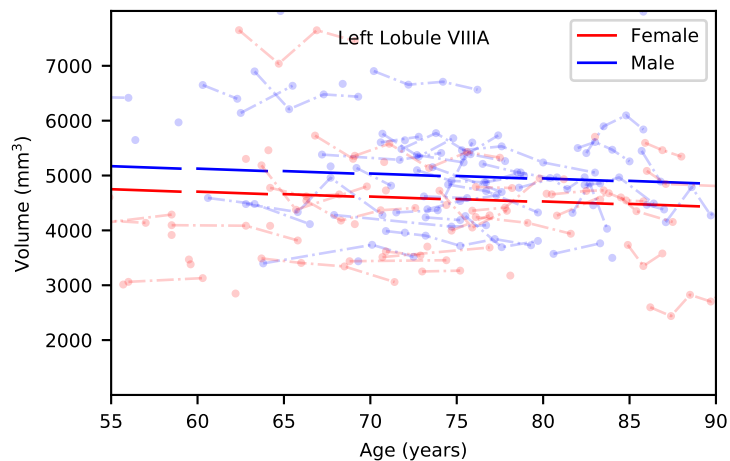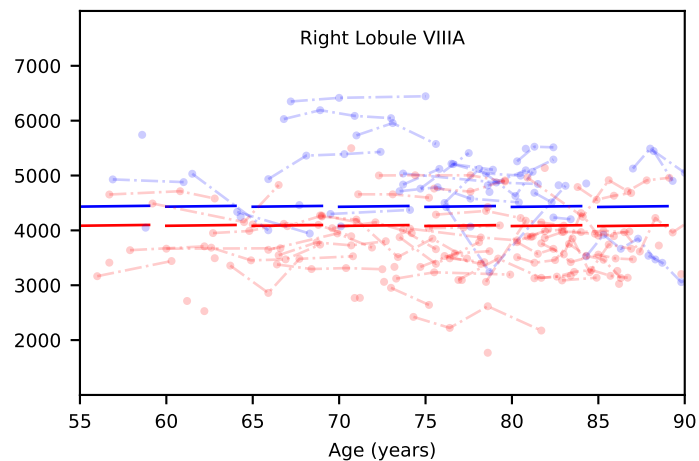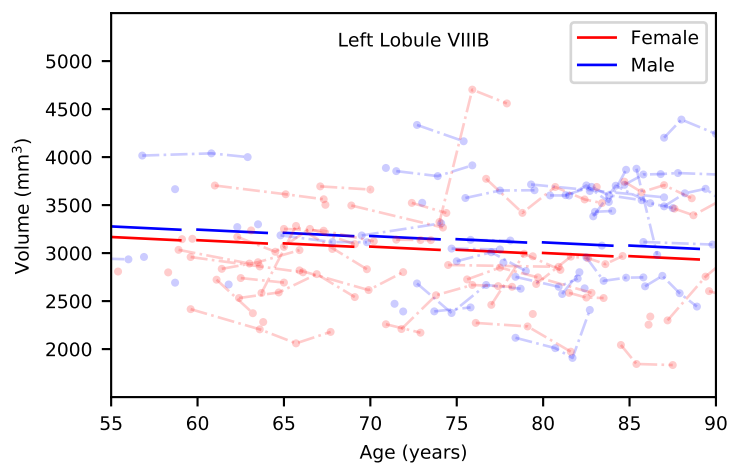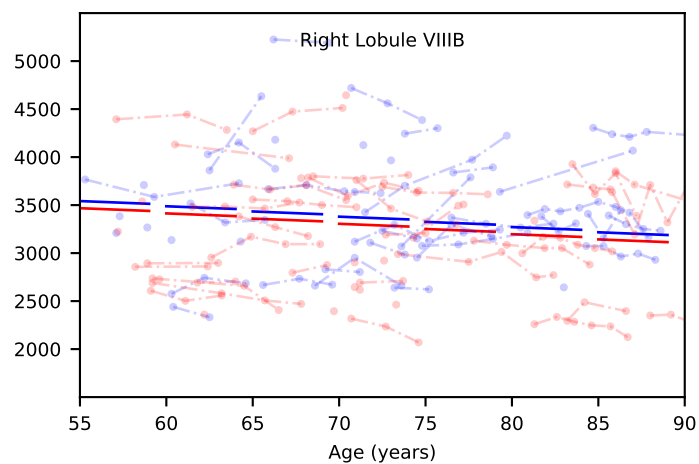



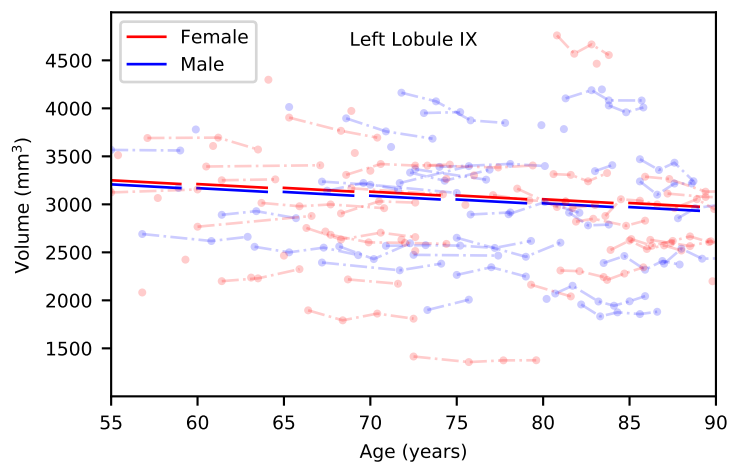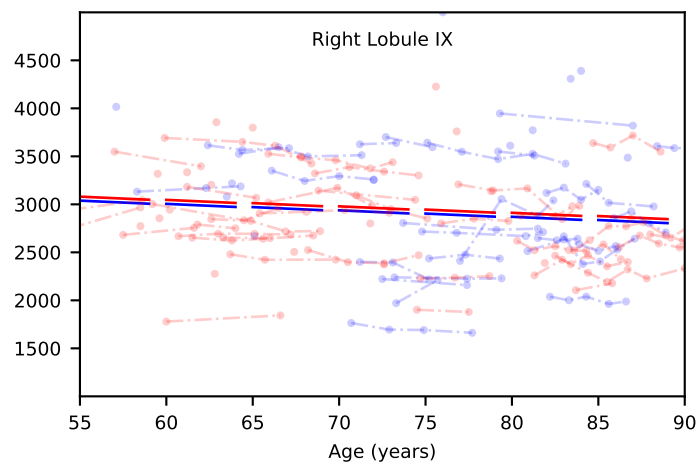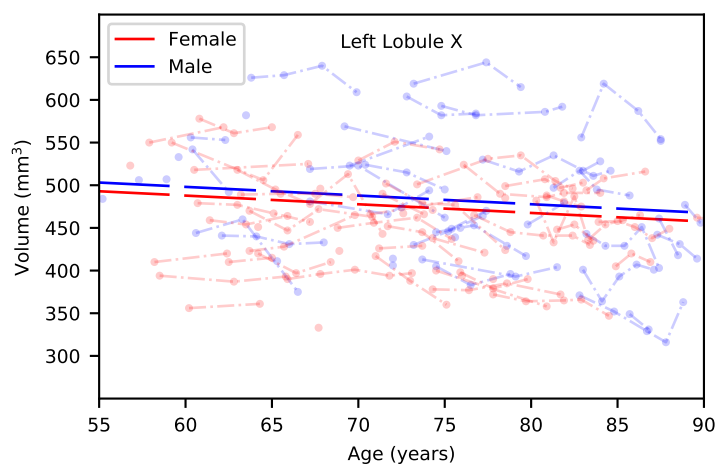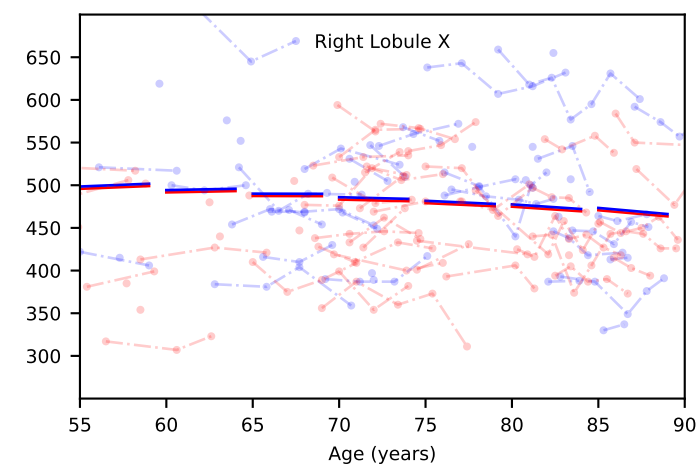

Supplement: NIHMS1925773-supplement-Supplement.pdf [file NIHMS1925773-supplement-Supplement.pdf]
